# Supplementary material for: Assessing future shifts in habitat suitability and connectivity to old-growth forests to support the conservation of the endangered giant noctule
Source: PeerJ. 2022 Nov 28;10:e14446. doi: 10.7717/peerj.14446 (PMC9744155; doi:10.7717/peerj.14446)
Supplement: Supplemental Information 1 — Details about the polygonal features representing European old-growth forests, obtained by refining in GIS environment the data about the forests occurrence localities contained in Sabatini et al. (2018). [file peerj-10-14446-s001.xlsx]

## Sheet: Supplementary_forests
Country	Forest_name	Author_definition	Naturalness	Dominant sp_1	Dominant sp_2	Area_Km2
Albania	Lumi i gashit	old-growth + fragments of virgin	n7 - Near-virgin Forest	Abies alba	Pinus heldreichi	9.55483
Albania	Mirdita	virgin	n6 - Old-growth Forest			0.0500254
Albania	Puka	virgin	n6 - Old-growth Forest			0.0360136
Albania	Rrajca	old-growth + significant virgin parts	n7 - Near-virgin Forest	Abies borisii-regis		10.7138
Albania	Rrajca	old-growth + significant virgin parts	n7 - Near-virgin Forest	Abies borisii-regis		10.7138
Austria	D├╝rrenstein	old-growth + significant virgin parts	n7 - Near-virgin Forest	Pinus mugo		13.7982
Austria	Kalkalpen - Urlach	old-growth + fragments of virgin	n6 - Old-growth Forest			2.41321
Austria	Kalkalpen - Wilder Graben	old-growth + fragments of virgin	n6 - Old-growth Forest			11.5032
Austria	Kalkalpen - Bodinggraben	old-growth + fragments of virgin	n6 - Old-growth Forest			7.84668
Austria	Kalkalpen - Hintergebirge	old-growth + fragments of virgin	n6 - Old-growth Forest			29.1734
Austria	Wilderness Area D├╝rrenstein	old-growth	n6 - Old-growth Forest	Picea abies	Abies alba	1.04755
Belgium	Sonian Forest - Forest Reserve ΓÇ£Joseph ZwaenepoelΓÇ¥	old-growth	n5 - Long Untouched Forest	Quercus		1.87432
Belgium	Sonian Forest - Grippensdelle B	old-growth	n5 - Long Untouched Forest	Quercus		0.373975
Belgium	Sonian Forest - R├⌐serve foresti├¿re du Ticton A	old-growth	n5 - Long Untouched Forest	Quercus		0.139871
Belgium	Sonian Forest - R├⌐serve foresti├¿re du Ticton B	old-growth	n5 - Long Untouched Forest	Quercus		0.0650266
Belgium	Sonian Forest ΓÇô Grippensdelle A	old-growth	n5 - Long Untouched Forest	Quercus		0.24121
Belgium	Sonian Forest, core zone of the Forest Reserve Joseph Zwaenepoel (Kersselaerspleyn)	n6 - Old-growth Forest	n5 - Long Untouched Forest	Quercus robur	Quercus petraea	0.110047
Bosnia-Herzegovina	Bobija	Pristine, virgin	n6 - Old-growth Forest	Fagus sylvatica		0.560265
Bosnia-Herzegovina	Igman	old-growth	n6 - Old-growth Forest	Fagus sylvatica		0.451211
Bosnia-Herzegovina	Janj	old-growth, virgin	n6 - Old-growth Forest	Picea abies	Fagus sylvatica	0.572272
Bosnia-Herzegovina	Lom	old-growth	n6 - Old-growth Forest	Abies alba	Picea abies	0.558264
Bosnia-Herzegovina	Perucica	old-growth	n7 - Near-virgin Forest	Fagus sylvatica	Picea abies	13.7444
Bosnia-Herzegovina	Pljesivica	old-growth, virgin	n6 - Old-growth Forest	Abies alba		0.388181
Bosnia-Herzegovina	Trstionica	old-growth	n6 - Old-growth Forest	Abies alba		0.305155
Bulgaria	Boatin Reserve	majority virgin	n7 - Near-virgin Forest			12.2159
Bulgaria	Dzhendema Reserve	majority virgin	n7 - Near-virgin Forest			8.03586
Bulgaria	Kozya stena Reserve	majority virgin	n7 - Near-virgin Forest			6.20596
Bulgaria	Parangalitsa	old-growth	n6 - Old-growth Forest	Abies alba	Fagus sylvatica	2.50123
Bulgaria	Peeshti skali Reserve	majority virgin	n7 - Near-virgin Forest			9.81795
Bulgaria	Severen Dzhendem Reserve	majority virgin	n7 - Near-virgin Forest			8.97067
Bulgaria	Sokolna Reserve	majority virgin	n7 - Near-virgin Forest			6.56543
Bulgaria	Stara reka Reserve	majority virgin	n7 - Near-virgin Forest			3.961
Bulgaria	Steneto Reserve	majority virgin	n7 - Near-virgin Forest			22.0479
Bulgaria	Tsarichina Reserve	majority virgin	n7 - Near-virgin Forest			14.3421
Croatia	─îorkova uvala	virgin\old-growth	n6 - Old-growth Forest	Fagus sylvatica		0.805386
Croatia	Devcica Tavani	old-growth	n6 - Old-growth Forest	Abies alba	Picea abies	1.00548
Croatia	Hajdu─ìki i Ro┼╛anski kukovi	majority virgin	n7 - Near-virgin Forest	Picea abies	Pinus sylvestris	11.9042
Croatia	Paklenica National Park - Oglavinovac-Javornik	majority virgin	n7 - Near-virgin Forest			5.47112
Croatia	Paklenica National Park - Suva draga-Klimenta	majority virgin	n7 - Near-virgin Forest			9.78932
Croatia	Velika Plje┼íivica - Drenova─ìa	virgin	n6 - Old-growth Forest	Abies alba		1.56916
Czech Republic	Boub├¡n	n9 - Virgin Forest	n6 - Old-growth Forest	Picea abies	Abies alba	0.460216
Czech Republic	Bukacka Forest	old-growth	n5 - Long Untouched Forest	Fagus sylvatica		0.500237
Czech Republic	CahnovΓÇôSoutok	old-growth	n5 - Long Untouched Forest	Quercus robur		0.126159
Czech Republic	Certovo Lake catchment	primary, old-growth	n6 - Old-growth Forest	Fagus sylvatica		0.80584
Czech Republic	─îert┼»v ml├╜n	virgin	n5 - Long Untouched Forest			0.500235
Czech Republic	Kn─¢hyn─¢	virgin	n5 - Long Untouched Forest			0.500236
Czech Republic	Mile┼íice	old-growth	n5 - Long Untouched Forest	Picea abies	Abies alba	0.100051
Czech Republic	Mion┼í├¡	old-growth	n5 - Long Untouched Forest	Abies alba		1.66038
Czech Republic	NP Podyj├¡ - Lipina	old-growth	n5 - Long Untouched Forest	Carpinus betulus		0.100043
Czech Republic	NP Podyj├¡ - Zl├íman├í sk├íla	old-growth	n5 - Long Untouched Forest	Pinus sylvestris		0.100051
Czech Republic	Ran┼ípurk	old-growth	n5 - Long Untouched Forest	Quercus robur		0.190096
Czech Republic	Razula	virgin	n5 - Long Untouched Forest	Abies alba	Picea abies	0.210095
Czech Republic	Salajka	old-growth	n5 - Long Untouched Forest	Abies alba		0.210095
Czech Republic	Sto┼╛ec	old-growth	n6 - Old-growth Forest	Picea abies	Acer pseudoplatanus	0.160071
Czech Republic	Trojmezna	old-growth	n6 - Old-growth Forest	Sorbus aucuparia		3.75803
Czech Republic	┼╜├íkova hora	old-growth	n5 - Long Untouched Forest	Acer pseudoplatanus		0.170076
Czech Republic	┼╜of├¡nsk├╜ Prales	virgin, old-growth	n6 - Old-growth Forest	Picea abies		0.750359
Denmark	H├╕stemark Skov	old-growth	n6 - Old-growth Forest	Quercus robur		0.732014
Denmark	Tofte Skov	old-growth	n6 - Old-growth Forest	Quercus robur	Alnus glutinosa	2.15254
Finland		old-growth	n5 - Long Untouched Forest	Picea abies		0.500236
Finland	Jaurakkavaara	old-growth	n6 - Old-growth Forest	Pinus sylvestris		4.00091
Finland	Juortaansalo	old-growth	n6 - Old-growth Forest	Pinus sylvestris		6.64143
Finland	Katinen Nature Reserve	old-growth	n6 - Old-growth Forest	Betula pubescens	Betula pendula	0.500236
Finland	Lososuo	old-growth	n6 - Old-growth Forest	Pinus sylvestris		0.694008
Finland	Louhenvaara	old-growth	n6 - Old-growth Forest	Pinus sylvestris		1.2792
Finland	Murronaho	old-growth	n6 - Old-growth Forest	Pinus sylvestris		1.19659
Finland	Olvassuo	old-growth	n6 - Old-growth Forest	Pinus sylvestris		3.43975
Finland	P├╢ntt├╢vaara	old-growth	n5 - Long Untouched Forest	Picea abies		1.35066
Finland	Reerisuo-Losusuo Mire Reserve	old-growth	n6 - Old-growth Forest	Pinus sylvestris		36.5407
Finland	Siikavaara west	old-growth	n6 - Old-growth Forest	Pinus sylvestris		21.4677
France	Fango Valley	old-growth	n6 - Old-growth Forest			0.150066
France	L'Ubac de M├⌐olans	old-growth	n6 - Old-growth Forest	Larix decidua	Quercus petraea	5.00248
France	La Luine	old-growth	n6 - Old-growth Forest			0.409201
France	La Tillaie	old-growth	n5 - Long Untouched Forest			0.337557
Germany		old-growth	n5 - Long Untouched Forest			0.0345346
Germany	G├╢ttinger Wald	old-growth	n5 - Long Untouched Forest			0.487127
Germany	Hainich		n5 - Long Untouched Forest	Fraxinus excelsior		5.94799
Germany	Kyffh├ñuser	old-growth	n5 - Long Untouched Forest			0.500236
Germany	L├╝neburger Heide	old-growth	n5 - Long Untouched Forest			0.475276
Germany	Mt. Brocken	old-growth	n6 - Old-growth Forest			3.00148
Germany	Rehberg	old-growth	n5 - Long Untouched Forest	Fagus sylvatica		0.496833
Germany	Serrahn	old-growth	n6 - Old-growth Forest	Quercus petraea	Pinus sylvestris	2.63988
Germany	Solling	old-growth	n5 - Long Untouched Forest			0.500254
Germany	Ziegelrodaer Forst	old-growth	n5 - Long Untouched Forest			0.500254
Greece	Baruga (Katafyki) Natural Monument	n5 - Long Untouched Forest	n5 - Long Untouched Forest	Pinus nigra		4.69111
Greece	Dasos 1000 dendron Mourion	n10 - Primeval Forest	n6 - Old-growth Forest	Alnus glutinosa	Fraxinus angustifolia subsp. oxycarpa	0.230763
Greece	Dasos Apollonias	n10 - Primeval Forest	n5 - Long Untouched Forest			0.30933
Greece	Frakto	n6 - Old-growth Forest	n7 - Near-virgin Forest	Pinus sylvestris	Pinus nigra	5.00248
Greece	Mavrologos	n7 - Near-virgin Forest	n6 - Old-growth Forest	Pinus nigra	Fagus sylvatica	0.500254
Hungary	K├⌐kes Forest Reserve	Old-growth Forest	n6 - Old-growth Forest	Acer pseudoplatanus	Ulmus scabra	0.55026
Hungary	Szalafoi Oserdo Forest Reserve	old-growth	n5 - Long Untouched Forest	Quercus robur	Pinus sylvestris	0.89543
Italy	Abeti Soprani	old-growth	n5 - Long Untouched Forest	Fagus sylvatica		0.500235
Italy	Area Pavari - Gargano	old-growth	n5 - Long Untouched Forest			0.400203
Italy	Bosco Aschiero	old-growth	n5 - Long Untouched Forest			0.0500254
Italy	Bosco Siro Negri	old-growth	n5 - Long Untouched Forest	Acer campestre		0.090038
Italy	Cervara	old-growth	n6 - Old-growth Forest			0.218337
Italy	Collemeluccio	old-growth	n5 - Long Untouched Forest			3.45334
Italy	Coppo del Morto	old-growth + significant virgin parts	n6 - Old-growth Forest			0.430536
Italy	Coppo del Principe	old-growth	n6 - Old-growth Forest			0.444814
Italy	Coppo del Principe	old-growth + significant virgin parts	n5 - Long Untouched Forest			1.49175
Italy	Cozzo Ferriero	old-growth	n5 - Long Untouched Forest	Acer pseudoplatanus		0.869308
Italy	Fonte Novello	old-growth	n6 - Old-growth Forest	Fagus sylvatica	Quercus cerris	0.451491
Italy	Fonte Regna	Secondary old-growth	n5 - Long Untouched Forest	Quercus ilex		0.0500254
Italy	Foresta Umbra	old-growth	n5 - Long Untouched Forest	Carpinus betulus	Acer obtusatum	1.82319
Italy	Monte Cimino	old-growth	n5 - Long Untouched Forest			0.620294
Italy	Monte Cimino	old-growth	n5 - Long Untouched Forest			0.575672
Italy	Monte Raschio	old-growth	n5 - Long Untouched Forest			0.737653
Italy	Monte Venere	Secondary old-growth	n5 - Long Untouched Forest			0.140071
Italy	MontediMezzo	old-growth	n5 - Long Untouched Forest	Quercus cerris		0.500254
Italy	Paneveggio	old-growth	n5 - Long Untouched Forest			0.800406
Italy	Sasso Fratino	old-growth	n6 - Old-growth Forest			7.81819
Italy	Sasso Fratino	old-growth	n6 - Old-growth Forest	Abies alba		7.64381
Italy	Selva Moricento	old-growth + significant virgin parts	n5 - Long Untouched Forest			1.47002
Italy	Val Fondillo	old-growth + significant virgin parts	n5 - Long Untouched Forest			3.23978
Italy	Valle Cervara	old-growth + significant virgin parts	n6 - Old-growth Forest			1.0863
Montenegro	Biogradska Gora	old-growth	n7 - Near-virgin Forest	Abies alba	Picea abies	11.2519
Norway	Dividalen valley	primeval\old-growth	n6 - Old-growth Forest	Betula pubescens		4.88859
Poland	Baniska	primeval	n6 - Old-growth Forest	Abies alba	Picea abies	1.42069
Poland	Bia┼éowieza	Primeval	n7 - Near-virgin Forest	Tilia cordata	Quercus robur	39.6832
Poland	Border Ridge and Upper Solinka Valley	majority virgin	n7 - Near-virgin Forest	Abies alba		14.0699
Poland	Czarna Hala	Primeval	n6 - Old-growth Forest	Abies alba	Picea abies	0.500235
Poland	Dolny P┼éay	Primeval	n6 - Old-growth Forest	Abies alba	Picea abies	0.500235
Poland	Gibiel	old-growth	n6 - Old-growth Forest	Pinus sylvestris	Carpinus betulus	0.300139
Poland	Hylaty (Jawornik)	primeval	n6 - Old-growth Forest			5.78666
Poland	Ja┼éowiecki Potok	Primeval	n6 - Old-growth Forest	Abies alba	Picea abies	0.500236
Poland	Lip├│wka	old-growth	n6 - Old-growth Forest	Carpinus betulus	Tilia cordata	0.250127
Poland	Pod Sokolica	Primeval	n6 - Old-growth Forest	Abies alba	Picea abies	0.500235
Poland	Polonia Wetli┼äska and Smerek	majority virgin	n7 - Near-virgin Forest	Abies alba		10.3997
Poland	Stream Terebowiec valley	majority virgin	n7 - Near-virgin Forest	Abies alba		1.99682
Poland	Stream Wolosatka valley	majority virgin	n7 - Near-virgin Forest	Abies alba		5.24377
Poland	Tworylczyk	primeval	n6 - Old-growth Forest			1.48072
Romania	Calimani C1	primary forest	n6 - Old-growth Forest			0.400203
Romania	Calimani C2	primary forest	n6 - Old-growth Forest			0.0800406
Romania	Calimani C3	primary forest	n6 - Old-growth Forest			0.120061
Romania	Calimani C4	primary forest	n6 - Old-growth Forest			0.120052
Romania	Calimani C5	primary forest	n6 - Old-growth Forest			0.100051
Romania	Cheile Nerei-Beu╚Öni╚¢a	majority virgin	n7 - Near-virgin Forest	Quercus	Carpinus betulus	42.9184
Romania	Codrul secular ╚ÿinca	majority virgin	n7 - Near-virgin Forest	Abies alba		3.38407
Romania	Codrul Secular Sl─âtioara	majority virgin	n7 - Near-virgin Forest	Picea abies		5.93051
Romania	Cosava Mica	n10 - Primeval Forest	n6 - Old-growth Forest			5.00248
Romania	Cozia - Lotrisor	majority virgin	n7 - Near-virgin Forest	Quercus	Picea abies	11.0299
Romania	Cozia - Masivul Cozia	majority virgin	n7 - Near-virgin Forest	Quercus	Picea abies	22.8015
Romania	Domogled - Valea Cernei- Ciucevele Cernei	majority virgin	n7 - Near-virgin Forest	Picea abies	Pinus sylvestris	9.5235
Romania	Domogled - Valea Cernei- Domogled-Coronini-Bedina	majority virgin	n7 - Near-virgin Forest	Picea abies	Pinus sylvestris	50.2989
Romania	Domogled - Valea Cernei- Iauna Craiovei	majority virgin	n7 - Near-virgin Forest	Picea abies	Pinus sylvestris	26.8185
Romania	Giumalau G1	primary forest	n6 - Old-growth Forest			0.98973
Romania	Gro╚Öii ╚Üible╚Öului - Izvorul ╚ÿurii	majority virgin	n7 - Near-virgin Forest			2.10653
Romania	Gro╚Öii ╚Üible╚Öului - Preluci	majority virgin	n7 - Near-virgin Forest			1.35886
Romania	Izvoarele Nerei	majority virgin	n7 - Near-virgin Forest	Abies alba		46.2196
Romania	Runcu-Grosi	old-growth	n6 - Old-growth Forest	Fagus sylvatica		2.61929
Romania	Sinca	Virgin, Primeval	n6 - Old-growth Forest	Abies alba		3.2386
Romania	Str├«mbu B─âiu╚¢	majority virgin	n7 - Near-virgin Forest	Abies alba	Picea abies	5.98437
Serbia	Busovata	virgin	n6 - Old-growth Forest			0.15868
Serbia	Danilova Kosa	virgin	n6 - Old-growth Forest			0.0600304
Serbia	Feljeshana	virgin	n6 - Old-growth Forest			0.152878
Serbia	Kukavica	virgin	n6 - Old-growth Forest			0.757984
Serbia	Vinatova─ìa	virgin	n6 - Old-growth Forest			0.188407
Slovakia	Babia hora	virgin	n6 - Old-growth Forest	Abies alba		4.60724
Slovakia	Bad├¡n	old-growth	n6 - Old-growth Forest	Abies alba		0.307142
Slovakia	Boky	primeval	n6 - Old-growth Forest	Quercus cerris		1.63287
Slovakia	Dobroc	old-growth	n6 - Old-growth Forest	Fagus sylvatica	Picea abies	0.498235
Slovakia	Dobro─ìsk├╜ prales	old-growth	n6 - Old-growth Forest	Abies alba	Picea abies	1.039
Slovakia	Have┼íov├í	old-growth	n6 - Old-growth Forest			1.71384
Slovakia	Hroncokovy grun	old-growth	n6 - Old-growth Forest	Fraxinus excelsior	Acer pseudoplatanus	0.552261
Slovakia	Kyjov	old-growth	n6 - Old-growth Forest			3.97597
Slovakia	Nefcersk├í dolina	virgin	n6 - Old-growth Forest			0.500236
Slovakia	Pol'ana	primeval	n6 - Old-growth Forest	Abies alba		0.400203
Slovakia	Ra┼ít├║n	old-growth	n6 - Old-growth Forest			5.48369
Slovakia	Ro┼╛ok	old-growth	n6 - Old-growth Forest			0.672341
Slovakia	┼ár├ímkov├í	primeval	n6 - Old-growth Forest	Abies alba	Picea abies	2.43042
Slovakia	Stu┼╛ica	Virgin, old-growth	n7 - Near-virgin Forest	Abies alba		7.61379
Slovakia	┼á├║tovsk├í Dolina National Nature Reserve	natural	n6 - Old-growth Forest	Picea abies	Abies alba	5.15722
Slovakia	Vt├í─ìnik	old-growth	n6 - Old-growth Forest			2.45721
Slovenia	Bukov Vrh	old-growth	n6 - Old-growth Forest	Abies alba		0.0930395
Slovenia	Gorjanci	old-growth	n6 - Old-growth Forest			0.227759
Slovenia	Kopa	old-growth	n5 - Long Untouched Forest			0.140571
Slovenia	Krokar	majority virgin	n7 - Near-virgin Forest	Abies alba	Acer pseudoplatanus	0.745356
Slovenia	Krokar	old-growth	n6 - Old-growth Forest			0.745356
Slovenia	Lucka Bela	old-growth	n6 - Old-growth Forest	Picea abies	Abies alba	0.20009
Slovenia	Pecka	old-growth	n6 - Old-growth Forest	Abies alba		0.595282
Slovenia	Rajhenavski Rog	old-growth	n6 - Old-growth Forest	Fagus sylvatica		0.511241
Slovenia	Sne┼╛nik-┼╜drocle	old-growth + fragments of virgin	n5 - Long Untouched Forest	Abies alba	Picea abies	7.18038
Slovenia	Strmec	old-growth	n6 - Old-growth Forest	Abies alba		0.156079
Slovenia	Sumik	old-growth	n6 - Old-growth Forest	Abies alba	Picea abies	0.193087
Spain		old-growth	n6 - Old-growth Forest			0.317365
Spain	Caviedes forest	old-growth	n5 - Long Untouched Forest	Quercus robur		1.10053
Spain	Hayedos de Ayll├│n -Montejo	old-growth + fragments of virgin	n5 - Long Untouched Forest	Pinus sylvestris	Quercus petraea	0.715111
Spain	Hayedos de Ayll├│n -Tejera Negra	old-growth + fragments of virgin	n5 - Long Untouched Forest	Pinus sylvestris	Quercus petraea	1.99108
Spain	Hayedos de Navarra -Aztaparreta	old-growth + significant virgin parts	n6 - Old-growth Forest	Abies alba	Pinus sylvestris	1.68732
Spain	Hayedos de Navarra -Lizardoia	old-growth + significant virgin parts	n5 - Long Untouched Forest	Abies alba	Pinus sylvestris	0.640004
Spain	Hayedos de Picos de Europa - Canal de Asot├¡n	old-growth + significant virgin parts	n6 - Old-growth Forest	Quercus		0.760401
Spain	Hayedos de Picos de Europa - Cuesta Fr├¡a	old-growth + significant virgin parts	n6 - Old-growth Forest	Quercus		1.71275
Spain	Muniellos	old-growth	n5 - Long Untouched Forest	Fagus sylvatica	Quercus orocantabrica	47.9006
Spain	Poyo de Santo Domingo	old-growth	n5 - Long Untouched Forest			0.448012
Sweden	Alpliden	old-growth	n6 - Old-growth Forest			4.56397
Sweden	Fiby urskog	Primeval	n6 - Old-growth Forest			0.700334
Sweden	Gardfj├ñllet Nature Reserve	old-growth	n6 - Old-growth Forest	Betula pubescens		1.51026
Sweden	Granladet Reserve	old-growth	n7 - Near-virgin Forest	Betula pubescens		252.81
Sweden	J├ñmtgaveln	old-growth	n6 - Old-growth Forest			4.87548
Sweden	K├Ñlhuvudet	old-growth	n6 - Old-growth Forest			4.82236
Sweden	Kirjes├Ñlandet	virgin	n6 - Old-growth Forest	Betula pubescens		3.00148
Sweden	Luott├Ñive	old-growth	n6 - Old-growth Forest			4.88136
Sweden	Stenbith├╢jden	old-growth	n6 - Old-growth Forest			4.65191
Sweden	V├ñstra Kvarken	old-growth	n6 - Old-growth Forest			0.00566995
Ukraine	Gorgany	majority virgin	n7 - Near-virgin Forest	Abies alba	Picea abies	7.53855
Ukraine	GR1	primeval	n6 - Old-growth Forest			0.482916
Ukraine	GR2	primeval	n6 - Old-growth Forest			0.500254
Ukraine	GR3	primeval	n6 - Old-growth Forest			0.500236
Ukraine	Maramuresh Pop-Ivan	Primeval	n7 - Near-virgin Forest	Abies alba	Picea abies	79.1255
Ukraine	Roztochya	old-growth + significant virgin parts	n6 - Old-growth Forest	Carpinus betulus	Pinus sylvestris	3.7624
Ukraine	Satan╤ûvska Dacha	old-growth + fragments of virgin	n5 - Long Untouched Forest			1.8391
Ukraine	SY1	primeval	n6 - Old-growth Forest			0.497614
Ukraine	SY2	primeval	n6 - Old-growth Forest			0.500236
Ukraine	SY3	primeval	n6 - Old-growth Forest			0.479531
Ukraine	Synevyr - Darvaika	majority virgin	n7 - Near-virgin Forest	Picea abies	Fraxinus excelsior	11.5215
Ukraine	Synevyr - Kvasovets	majority virgin	n6 - Old-growth Forest	Picea abies	Fraxinus excelsior	5.46378
Ukraine	Synevyr - Strymba	majority virgin	n6 - Old-growth Forest	Picea abies	Fraxinus excelsior	2.60778
Ukraine	Synevyr - Vilshany	majority virgin	n6 - Old-growth Forest	Picea abies	Fraxinus excelsior	4.4105
Ukraine	Uholka	Primeval, virgin	n7 - Near-virgin Forest			97.5248
Ukraine	Zacharovanyi Krai - Irshavka	majority virgin	n6 - Old-growth Forest	Acer pseudoplatanus		0.940153
Ukraine	Zacharovanyi Krai - Velykyi Dil	majority virgin	n7 - Near-virgin Forest	Acer pseudoplatanus		11.6474
