# Supplementary material for: Assessing future shifts in habitat suitability and connectivity to old-growth forests to support the conservation of the endangered giant noctule
Source: PeerJ. 2022 Nov 28;10:e14446. doi: 10.7717/peerj.14446 (PMC9744155; doi:10.7717/peerj.14446)
Supplement: Supplemental Information 3 — For each of the variables selected to fit the climate-based ENMs are reported the corresponding VIF score and the relative contribution within the GBM model fitted using the optimized parameter combination individuated through model tuning (see Materials and methods – Ecological Niche Modelling in the main text). [file peerj-10-14446-s003.xlsx]

## Sheet: Foglio1
Variable	VIF score	Relative contribution (%)
BIO6	4.26882	38.1889
BIO2	2.33538	18.2506
BIO12	3.63018	17.5562
BIO01	7.42357	16.4482
BIO17	9.11092	9.55613
